# Supplementary material for: Teachers' aggressive behaviors: what is considered acceptable and why?
Source: PubMed Central journal article supplement — Heliyon. 2020 Oct 17;6(10):e05082. doi: 10.1016/j.heliyon.2020.e05082 (PMC7575843; doi:10.1016/j.heliyon.2020.e05082), 2020-10-17
Supplement: mmc1.pdf [file mmc1.pdf]

**SUPPLEMENTARY MATERIAL****JOURNAL: HELIYON****Teachers' Aggressive Behaviors: What is Considered Acceptable and Why?**

Rangga Dewati Suryaningrat

Faculty of Psychology, Universitas Indonesia

Frieda Maryam Mangunsong\*

Faculty of Psychology, Universitas Indonesia

Corina D. Riantoputra

Faculty of Psychology, Universitas Indonesia

**\*Corresponding Author:**

Frieda Maryam Mangunsong,

Faculty of Psychology, Universitas Indonesia, Kampus UI–Depok, Indonesia, 16424.

E-mail: [friemang@ui.ac.id](mailto:friemang@ui.ac.id)
